# Supplementary material for: A Vaccinia Virus Armed with Interleukin-10 Is a Promising Therapeutic Agent for Treatment of Murine Pancreatic Cancer
Source: Oxford University Press journal article supplement (doi:10.1158/1078-0432.ccr-14-0464), 2014-11-22
Supplement: 10780432ccr140464-sup-127593_3_supp_2668023_nc5s33.docx [file 10780432ccr140464-sup-127593_3_supp_2668023_nc5s33.docx]

**Supplementary Table 1. Primers and probes used for qPCR**

| **Gene** | **Primer/Probe** | **Sequence** |
| --- | --- | --- |
| **VVL VLTF-1*** | Probe | 6-FAM-ATTTTAGAACAGAAATACCC-MGB |
|  | Sense Primer | 5’-AACCATAGAAGCCAACGAATCC-3’ |
|  | Antisense  Primer | 5’-TGAGACATACAAGGGTGGTGAAGT |

***** Viral late transcription factor 1
